# Supplementary material
Source: PubMed Central journal article supplement (PMC6777802)
Supplement: jciinsight-4-129299-s178.pdf [file jciinsight-4-129299-s178.pdf]

## Supplementary Online Material

# The Long Non-coding RNA *MALAT1* Predicts Human Islet Isolation Quality

Wilson K.M. Wong<sup>1</sup>, Guozhi Jiang<sup>2</sup>, Anja E. Sørensen<sup>3</sup>, Yi Vee Chew<sup>4</sup>, Cody Lee-Maynard<sup>1</sup>, David Liuwantara<sup>4</sup>, Lindy Williams<sup>4</sup>, Philip O'Connell<sup>4</sup>, Louise T. Dalgaard<sup>3</sup>, Ronald C. Ma<sup>2</sup>, Wayne J. Hawthorne<sup>4,\*</sup>, Mugdha V. Joglekar<sup>1,\*</sup> and Anandwardhan A. Hardikar<sup>1,\*</sup>

Running title: The lncRNA *MALAT1* predicts islet isolation outcome

- 1- Diabetes and Islet Biology Group, NHMRC Clinical Trials Centre, The University of Sydney, Level 6, Medical Foundation Building, 92-94 Parramatta Road, Camperdown, NSW 2050, Australia.
- 2- Department of Medicine and Therapeutics, The Chinese University of Hong Kong, Prince of Wales Hospital, Hong Kong.
- 3- Department of Science and Environment, Roskilde University, Universitetsvej 1, DK-4000 Roskilde, Denmark
- 4- Centre for Transplant and Renal Research, Westmead Institute for Medical Research, Sydney University, 176 Hawkesbury Rd., Westmead, NSW 2145, Australia.

\* Equal senior authors; address for correspondence:

\*Wayne J Hawthorne,  
Centre for Transplant and Renal Research, Westmead Institute for Medical Research, Sydney University, 176 Hawkesbury Rd., Westmead, NSW 2145, Australia.  
E-mail: [wayne.hawthorne@sydney.edu.au](mailto:wayne.hawthorne@sydney.edu.au)

\*Mugdha V. Joglekar or \*Anandwardhan A. Hardikar  
Diabetes and Islet Biology Group, NHMRC Clinical Trials Centre,  
The University of Sydney, Level 6, Medical Foundation Building,  
92-94 Parramatta Road, Camperdown,  
NSW 2050, AUSTRALIA  
Phone: +61 2 9562 5071 | Fax: +61 2 9565 1863  
E-mails: [mugdha.joglekar@sydney.edu.au](mailto:mugdha.joglekar@sydney.edu.au); [anand.hardikar@sydney.edu.au](mailto:anand.hardikar@sydney.edu.au)  
Web: <http://www.isletbiology.com/> | <http://www.ctc.usyd.edu.au/>

1  
2  
3

|                                    | Group 1  |          | Group 2  |          | Group 3  |          | Adjusted P-value (ANOVA) |              |              |
|------------------------------------|----------|----------|----------|----------|----------|----------|--------------------------|--------------|--------------|
|                                    | Average  | SD       | Average  | SD       | Average  | SD       | 1 vs. 2                  | 1 vs. 3      | 2 vs. 3      |
| Donor gender: Female (F)/ Male (M) | 2/3      |          | 2/4      |          | 2/5      |          |                          |              |              |
| Donor Age(yrs)                     | 49.8     | 5.6      | 50.3     | 9.4      | 43.9     | 18.4     | 0.95                     | 0.77         | 0.77         |
| Donor BMI kg/m2                    | 29.0     | 1.4      | 30.4     | 13.4     | 26.0     | 4.2      | 0.80                     | 0.80         | 0.73         |
| <b>Islet quality score</b>         | 0.4      | 0.1      | 0.7      | 0.1      | 1.2      | 0.5      | 0.13                     | <b>0.001</b> | <b>0.011</b> |
| Edmonton Donor Points              | 81.5     | 8.7      | 67.3     | 15.8     | 58.7     | 13.8     | 0.19                     | <b>0.04</b>  | 0.28         |
| NAIDS                              | 75.0     | 4.2      | 71.2     | 11.3     | 57.4     | 10.5     | 0.52                     | <b>0.02</b>  | <b>0.04</b>  |
| Cold Ischemia (mins)               | 319.6    | 148.9    | 464.4    | 156.3    | 447.6    | 140.3    | 0.37                     | 0.37         | 0.85         |
| Pancreas wt. (g)                   | 94.0     | 10.8     | 102.8    | 20.8     | 79.1     | 18.1     | 0.42                     | 0.31         | 0.08         |
| Pancreas undigested (g)            | 13.7     | 6.5      | 21.7     | 14.2     | 13.6     | 6.9      | 0.42                     | 0.98         | 0.42         |
| Pancreas wt digested(g)            | 80.3     | 15.2     | 68.8     | 10.5     | 65.5     | 16.7     | 0.38                     | 0.28         | 0.69         |
| Total Time in chamber(min)         | 63.6     | 9.6      | 51.0     | 7.6      | 55.4     | 13.5     | 0.20                     | 0.38         | 0.47         |
| Time to 37°C (min)                 | 9.3      | 3.8      | 9.6      | 3.6      | 10.0     | 3.7      | 0.98                     | 0.98         | 0.98         |
| Total IEQ                          | 434542.6 | 138126.5 | 372350.2 | 306254.5 | 284580.1 | 240077.6 | 0.64                     | 0.16         | >0.9999      |
| Pure IEQ                           | 374322.2 | 171793.0 | 217493.3 | 115840.3 | 167738.4 | 98388.2  | 0.12                     | <b>0.04</b>  | 0.49         |
| Stimulation Index                  | 1.6      | 0.7      | 1.7      | 1.1      | 1.4      | 0.4      | 0.91                     | 0.91         | 0.88         |

4

5 **Supplementary Table 1: Details and characteristics of cadaveric donor islets used in the discovery set (n=18) for this study.** Different  
6 clinical parameters of the donor, pancreas and isolation steps are presented in this table for the 18 islet samples that were used as discovery set. A  
7 Chi-square test was applied on the donor sex across the groups in the discovery set (P-values = 0.92). One-way ANOVA multiple comparison was  
8 then used to assess significant differences across groups. The P-value adjusted for multiple comparisons is presented. P values less than 0.05 are  
9 highlighted in red.

10

11

1  
2  
3  
4

|                                    | Group 1  |          | Group 2  |          | Group 3  |          | Adjusted P-value (ANOVA) |         |         |
|------------------------------------|----------|----------|----------|----------|----------|----------|--------------------------|---------|---------|
|                                    | Average  | SD       | Average  | SD       | Average  | SD       | 1 vs. 2                  | 1 vs. 3 | 2 vs. 3 |
| Donor gender: Female (F)/ Male (M) | 21/19    |          | 7/11     |          | 5/12     |          |                          |         |         |
| Donor Age(yrs)                     | 46.9     | 8.8      | 46.7     | 13.4     | 41.0     | 14.7     | 0.95                     | 0.23    | 0.28    |
| Donor BMI kg/m2                    | 30.2     | 6.5      | 28.1     | 5.1      | 27.0     | 4.2      | 0.35                     | 0.16    | 0.57    |
| <b>Islet quality score</b>         | 0.5      | 0.1      | 0.7      | 0.1      | 1.6      | 0.9      | 0.06                     | <0.0001 | <0.0001 |
| Edmonton Donor Points              | 73.2     | 10.5     | 70.1     | 11.2     | 66.5     | 15.6     | 0.60                     | 0.19    | 0.60    |
| NAIDS                              | 67.3     | 15.2     | 67.8     | 11.5     | 62.9     | 17.8     | 0.89                     | 0.68    | 0.68    |
| Cold Ischemia (mins)               | 429.7    | 154.3    | 437.9    | 135.0    | 418.2    | 128.3    | 0.97                     | 0.97    | 0.97    |
| Pancreas wt. (g)                   | 91.6     | 30.1     | 95.0     | 17.7     | 84.8     | 18.0     | 0.64                     | 0.58    | 0.56    |
| Pancreas undigested (g)            | 17.6     | 11.0     | 12.9     | 6.7      | 22.0     | 14.0     | 0.25                     | 0.25    | 0.05    |
| Pancreas wt digested(g)            | 74.0     | 30.4     | 82.1     | 16.6     | 62.8     | 24.6     | 0.28                     | 0.28    | 0.10    |
| Total Time in chamber(min)         | 58.3     | 6.7      | 56.1     | 11.1     | 58.2     | 13.1     | 0.81                     | 0.98    | 0.81    |
| Time to 37°C (min)                 | 11.0     | 4.2      | 8.8      | 4.0      | 9.6      | 4.1      | 0.20                     | 0.44    | 0.58    |
| Total IEQ                          | 403265.3 | 244714.9 | 405281.6 | 249660.6 | 243918.2 | 147965.5 | 0.98                     | 0.05    | 0.08    |
| Pure IEQ                           | 328521.1 | 237911.5 | 299803.8 | 214721.0 | 155396.2 | 83995.6  | 0.63                     | 0.02    | 0.09    |
| Stimulation Index                  | 2.0      | 1.2      | 1.6      | 0.7      | 1.5      | 0.7      | 0.30                     | 0.29    | 0.76    |

5

6 **Supplementary Table 2: Details and characteristics of cadaveric donor islets used in the validation set (n=75) in this study.** Different clinical  
7 parameters of the donor, pancreas and isolation steps are presented in this table for the 75 islet samples that were used as validation set. A Chi-  
8 square test was applied on the donor sex across the groups in the validation set (P-values = 0.24). One-way ANOVA multiple comparison was  
9 then used to assess significant differences across groups. The P-value adjusted for multiple comparisons is presented. P values less than 0.05 are  
10 highlighted in red.

11  
12  
13  
14

1

2

|                                    | Group 1  |          | Group 3  |          | P-value (Mann-Whitney test) |
|------------------------------------|----------|----------|----------|----------|-----------------------------|
|                                    | Average  | SD       | Average  | SD       | 1 vs. 3                     |
| Donor gender: Female (F)/ Male (M) | 7/7      | -        | 2/3      | -        |                             |
| Donor Age(yrs)                     | 45.7     | 9.1      | 33.0     | 12.6     | 0.05                        |
| Donor BMI kg/m2                    | 31.5     | 6.0      | 25.0     | 4.5      | 0.07                        |
| <b>Islet quality score</b>         | 0.4      | 0.1      | 1.3      | 0.9      | <b>&lt;0.0001</b>           |
| Edmonton Donor Points              | 71.7     | 10.6     | 63.7     | 19.6     | 0.61                        |
| NAIDS                              | 75.3     | 9.7      | 54.8     | 21.5     | <b>0.02</b>                 |
| Total IEQ                          | 495529.1 | 240182.4 | 211120.8 | 131062.8 | <b>0.01</b>                 |
| Cold Ischemia (mins)               | 432.4    | 96.9     | 415.2    | 96.0     | 0.62                        |
| Pancreas wt. (g)                   | 93.7     | 21.6     | 86.4     | 23.9     | 0.67                        |
| Pancreas undigested (g)            | 14.7     | 9.8      | 13.1     | 10.2     | 0.74                        |
| Pancreas wt digested(g)            | 79.0     | 17.6     | 73.3     | 18.2     | 0.55                        |
| Total Time in chamber(min)         | 58.4     | 6.2      | 55.8     | 5.1      | 0.43                        |
| Time to 37°C (min)                 | 13.2     | 4.0      | 9.7      | 4.5      | 0.12                        |
| Total Islet No.                    | 166987.9 | 46929.2  | 118666.6 | 57197.6  | 0.19                        |
| Pure IEQ                           | 441379.8 | 245688.5 | 170797.8 | 84169.9  | <b>0.0007</b>               |
| Stimulation Index                  | 3.1      | 1.6      | 1.5      | 0.3      | 0.01                        |

3

4 **Supplementary Table 3: Details and characteristics of cadaveric donor pancreas used in the prediction set (n=19 pancreas) in this study**

5 Different clinical parameters of the donor, pancreas and isolation steps are presented in this table for the 19 pancreas samples that were used as  
6 prediction set. A Fisher's exact test was performed on the donor sex across the groups in the pancreas predict set (P-value >0.9999). Mann-Whitney  
7 test was then used to assess significant differences across groups and resulting P-values are presented. P values less than 0.05 are highlighted in  
8 red.

9

1  
2

**LncRNA: Group 1 (N=5) vs Group 2 (N=6)** □

| Transcript ID     | Gene ID           | Official Symbol | Gene type | Frequency (%) |
|-------------------|-------------------|-----------------|-----------|---------------|
| ENST00000616691.1 | ENSG00000251562.7 | MALAT1          | lincRNA   | 93.6          |
| ENST00000419809.1 | ENSG00000235495.1 | AC010987.5      | lincRNA   | 57.8          |
| ENST00000619449.1 | ENSG00000251562.7 | MALAT1          | lincRNA   | 45.3          |
| ENST00000544034.1 | ENSG00000256725.1 | RP11-662M24.2   | lincRNA   | 24.5          |
| ENST00000583934.1 | ENSG00000265401.1 | RP11-138I1.4    | antisense | 1             |

**LncRNA: Group 2 (N=6) vs Group 3 (N=7)**

| Transcript ID     | Gene ID            | Official Symbol | Gene type            | Frequency (%) |
|-------------------|--------------------|-----------------|----------------------|---------------|
| ENST00000620902.1 | ENSG00000251562.7  | MALAT1          | lincRNA              | 98.7          |
| ENST00000530422.1 | ENSG00000254911.3  | SCARNA9         | antisense            | 65            |
| ENST00000414790.5 | ENSG00000130600.15 | H19             | processed_transcript | 63.9          |
| ENST00000583934.1 | ENSG00000265401.1  | RP11-138I1.4    | antisense            | 58.4          |
| ENST00000418403.1 | ENSG00000237643.1  | RP11-462G2.1    | lincRNA              | 29.7          |
| ENST00000419809.1 | ENSG00000235495.1  | AC010987.5      | lincRNA              | 25.8          |
| ENST00000450589.5 | ENSG00000234741.7  | GAS5            | processed_transcript | 24.5          |
| ENST00000414002.5 | ENSG00000203875.10 | SNHG5           | processed_transcript | 19            |
| ENST00000563192.1 | ENSG00000260260.1  | SNHG19          | lincRNA              | 0.1           |
| ENST00000601801.2 | ENSG00000245532.5  | NEAT1           | lincRNA              | 0.1           |

**LncRNA: Group 1 (N=5) vs Group 3 (N=7)**

| Transcript ID     | Gene ID            | Official Symbol | Gene type            | Frequency (%) |
|-------------------|--------------------|-----------------|----------------------|---------------|
| ENST00000616691.1 | ENSG00000251562.7  | MALAT1          | lincRNA              | 96.3          |
| ENST00000620902.1 | ENSG00000251562.7  | MALAT1          | lincRNA              | 45.9          |
| ENST00000619449.1 | ENSG00000251562.7  | MALAT1          | lincRNA              | 31.5          |
| ENST00000418403.1 | ENSG00000237643.1  | RP11-462G2.1    | lincRNA              | 12.2          |
| ENST00000414002.5 | ENSG00000203875.10 | SNHG5           | processed_transcript | 0.3           |
| ENST00000414790.5 | ENSG00000130600.15 | H19             | processed_transcript | 0.3           |

3  
4  
5  
6  
7  
8  
9  
10  
11

**Supplementary Table 4:** Bootstrap frequency tables of the random sampling revalidation performed using penalized logistic regression analysis. Bootstrap revalidation was performed 1000 times, wherein a different (~37%) subset of samples are eliminated at random in each penalized regression analysis iteration. A penalized linear regression analysis with bootstrapping delivered similar outcomes where *MALAT1* variants were identified as the top three candidates with a bootstrap frequency ranging from 57-78% (data not shown).

Isolation outcome: Transplantable Yes(1) (N=5) vs No(0) (N=13)

| Transcript ID     | Gene ID           | Official Symbol | Gene type | Frequency (%) |
|-------------------|-------------------|-----------------|-----------|---------------|
| ENST00000616691.1 | ENSG00000251562.7 | MALAT1          | lincRNA   | 94.3          |
| ENST00000619449.1 | ENSG00000251562.7 | MALAT1          | lincRNA   | 46.1          |
| ENST00000544034.1 | ENSG00000256725.1 | RP11-662M24.2   | lincRNA   | 44.8          |
| ENST00000620902.1 | ENSG00000251562.7 | MALAT1          | lincRNA   | 28.4          |
| ENST00000418403.1 | ENSG00000237643.1 | RP11-462G2.1    | lincRNA   | 9.8           |

LncRNA: Post-Iso Purity (N=15)

| Transcript ID     | Gene ID            | Official Symbol | Gene type            | Frequency (%) |
|-------------------|--------------------|-----------------|----------------------|---------------|
| ENST00000616691.1 | ENSG00000251562.7  | MALAT1          | lincRNA              | 68.8          |
| ENST00000414790.5 | ENSG00000130600.15 | H19             | processed transcript | 58.8          |
| ENST00000620902.1 | ENSG00000251562.7  | MALAT1          | lincRNA              | 49.3          |
| ENST00000619449.1 | ENSG00000251562.7  | MALAT1          | lincRNA              | 32.5          |
| ENST00000602520.5 | ENSG00000269893.6  | SNHG8           | lincRNA              | 28.6          |
| ENST00000563192.1 | ENSG00000260260.1  | SNHG19          | lincRNA              | 21.5          |
| ENST00000544034.1 | ENSG00000256725.1  | RP11-662M24.2   | lincRNA              | 13.8          |
| ENST00000414002.5 | ENSG00000203875.10 | SNHG5           | processed transcript | 12.8          |
| ENST00000576784.1 | ENSG00000262831.1  | RP11-498C9.2    | antisense            | 10.8          |
| ENST00000450589.5 | ENSG00000234741.7  | GAS5            | processed transcript | 10.5          |
| ENST00000418403.1 | ENSG00000237643.1  | RP11-462G2.1    | lincRNA              | 8.1           |
| ENST00000430245.5 | ENSG00000234741.7  | GAS5            | processed transcript | 4.1           |
| ENST00000508832.2 | ENSG00000251562.7  | MALAT1          | lincRNA              | 0.1           |

LncRNA: Post-Iso Viability (N=16)

| Transcript ID     | Gene ID            | Official Symbol | Gene type            | Frequency (%) |
|-------------------|--------------------|-----------------|----------------------|---------------|
| ENST00000541782.1 | ENSG00000276232.1  | SCARNA10        | sense intronic       | 65.1          |
| ENST00000583934.1 | ENSG00000265401.1  | RP11-138I1.4    | antisense            | 38.2          |
| ENST00000616691.1 | ENSG00000251562.7  | MALAT1          | lincRNA              | 37.2          |
| ENST00000414002.5 | ENSG00000203875.10 | SNHG5           | processed transcript | 35.3          |
| ENST00000620902.1 | ENSG00000251562.7  | MALAT1          | lincRNA              | 29.6          |
| ENST00000619449.1 | ENSG00000251562.7  | MALAT1          | lincRNA              | 24.5          |
| ENST00000418403.1 | ENSG00000237643.1  | RP11-462G2.1    | lincRNA              | 10.8          |
| ENST00000530422.1 | ENSG00000254911.3  | SCARNA9         | antisense            | 8.4           |
| ENST00000602520.5 | ENSG00000269893.6  | SNHG8           | lincRNA              | 7.7           |
| ENST00000499732.2 | ENSG00000245532.5  | NEAT1           | lincRNA              | 2.5           |
| ENST00000601801.2 | ENSG00000245532.5  | NEAT1           | lincRNA              | 1.9           |
| ENST00000430245.5 | ENSG00000234741.7  | GAS5            | processed transcript | 0.9           |
| ENST00000491934.2 | ENSG00000269926.1  | RP11-442H21.2   | antisense            | 0.1           |
| ENST00000580180.5 | ENSG00000175061.17 | LRRC75A-AS1     | processed transcript | 0.1           |
| ENST00000548900.1 | ENSG00000257764.2  | RP11-1143G9.4   | antisense            | 0.1           |
| ENST00000508832.2 | ENSG00000251562.7  | MALAT1          | lincRNA              | 0.1           |

LncRNA: Beta cell Viability Index (N=14)

| Transcript ID     | Gene ID            | Official Symbol | Gene type            | Frequency (%) |
|-------------------|--------------------|-----------------|----------------------|---------------|
| ENST00000616691.1 | ENSG00000251562.7  | MALAT1          | lincRNA              | 79.9          |
| ENST00000541782.1 | ENSG00000276232.1  | SCARNA10        | sense intronic       | 64.5          |
| ENST00000419809.1 | ENSG00000235495.1  | AC010987.5      | lincRNA              | 44.9          |
| ENST00000619449.1 | ENSG00000251562.7  | MALAT1          | lincRNA              | 34.7          |
| ENST00000414790.5 | ENSG00000130600.15 | H19             | processed transcript | 22.4          |
| ENST00000544034.1 | ENSG00000256725.1  | RP11-662M24.2   | lincRNA              | 21.3          |
| ENST00000602520.5 | ENSG00000269893.6  | SNHG8           | lincRNA              | 19.5          |
| ENST00000418403.1 | ENSG00000237643.1  | RP11-462G2.1    | lincRNA              | 8.9           |
| ENST00000530422.1 | ENSG00000254911.3  | SCARNA9         | antisense            | 7.1           |
| ENST00000499732.2 | ENSG00000245532.5  | NEAT1           | lincRNA              | 5.9           |
| ENST00000602946.1 | ENSG00000269968.1  | RP5-940J5.9     | antisense            | 2.9           |
| ENST00000601801.2 | ENSG00000245532.5  | NEAT1           | lincRNA              | 0.6           |
| ENST00000602607.1 | ENSG00000269971.1  | RP3-426I6.5     | sense intronic       | 0.1           |

1

2

3

4

5

6

7

8

**Supplementary Table 5:** Bootstrap frequency tables of the random sampling revalidation performed using penalized logistic/linear regression analysis. Bootstrap revalidation was performed 1000 times, wherein a different (~37%) subset of samples are eliminated a random in each penalized regression analysis. This was performed separately on the annotated lncRNAs for each criterion (islet purity, islet viability, beta-cell viability and transplantable outcome).

1  
2  
3

| Transcript ID     | Gene ID           | Official Symbol | Spearman R      |                    |                           | P-value         |                    |                           | Transplantable (yes/no) |
|-------------------|-------------------|-----------------|-----------------|--------------------|---------------------------|-----------------|--------------------|---------------------------|-------------------------|
|                   |                   |                 | Post-Iso Purity | Post-Iso Viability | Beta-cell Viability Index | Post-Iso Purity | Post-Iso Viability | Beta-cell Viability Index |                         |
| ENST00000619449.1 | ENSG00000251562.7 | MALAT1          | 0.35            | 0.31               | 0.59                      | 0.20            | 0.25               | 0.03                      | 0.01                    |
| ENST00000620902.1 | ENSG00000251562.7 | MALAT1          | 0.52            | 0.51               | 0.33                      | 0.05            | 0.04               | 0.25                      | 0.35                    |
| ENST00000508832.2 | ENSG00000251562.7 | MALAT1          | 0.28            | 0.37               | 0.55                      | 0.31            | 0.15               | 0.05                      | 0.05                    |
| ENST00000616691.1 | ENSG00000251562.7 | MALAT1          | 0.47            | 0.37               | 0.63                      | 0.08            | 0.16               | 0.02                      | 0.01                    |

4  
5  
6  
7

**Supplementary Table 6:** Univariate analysis on key MALAT1 splice variants to the individual key parameters (used to categorize the islet samples into three groups). Results presented in Spearman correlation r and (two-tailed) P-value. Results of transplantable (yes/no) are presented in T-test (two-tail, unequal variance) P-value.

1

| #  | Sample name | Group | RNA integrity number (RIN) | Raw reads   | Clean reads | Q20 (%) | Q30 (%) | GC content (%) |
|----|-------------|-------|----------------------------|-------------|-------------|---------|---------|----------------|
| 1  | S164        | 1     | 8.4                        | 78,802,166  | 77,339,700  | 97.44   | 93.53   | 55.41          |
| 2  | S177        | 1     | 7.6                        | 66,511,572  | 64,966,358  | 97.73   | 94.19   | 52.97          |
| 3  | S321        | 1     | 8                          | 72,222,866  | 70,996,486  | 97.49   | 93.65   | 52.22          |
| 4  | S396        | 1     | 7.4                        | 69,876,510  | 65,439,016  | 97.82   | 94.42   | 53.37          |
| 5  | S712        | 1     | 7.5                        | 82,376,566  | 79,133,946  | 97.42   | 93.67   | 47.03          |
| 6  | S234        | 2     | 8.4                        | 80,493,292  | 79,142,328  | 97.61   | 93.87   | 56.38          |
| 7  | S263        | 2     | 7.9                        | 80,505,416  | 79,142,530  | 97.56   | 93.79   | 53.56          |
| 8  | S462        | 2     | 8.5                        | 79,920,228  | 76,864,340  | 97.49   | 93.77   | 51.13          |
| 9  | S574        | 2     | 8.1                        | 87,752,734  | 82,251,092  | 97.5    | 93.76   | 52.81          |
| 10 | S726        | 2     | 8.8                        | 102,342,918 | 98,561,112  | 97.7    | 94.19   | 54.14          |
| 11 | S75         | 2     | 7.7                        | 79,893,996  | 77,589,020  | 96.37   | 91.09   | 52.89          |
| 12 | S118        | 3     | 8.6                        | 73,812,942  | 72,542,198  | 97.45   | 93.55   | 53.97          |
| 13 | S178        | 3     | 8.7                        | 76,429,010  | 75,167,708  | 97.54   | 93.74   | 52.98          |
| 14 | S298        | 3     | 8.3                        | 68,592,214  | 67,305,720  | 97.27   | 93.23   | 52.9           |
| 15 | S458        | 3     | 7.9                        | 76,175,086  | 71,963,744  | 97.53   | 93.94   | 53             |
| 16 | S745        | 3     | 8.6                        | 104,472,950 | 97,755,578  | 97.65   | 94.05   | 57.53          |
| 17 | S975        | 3     | 8                          | 80,372,466  | 74,648,616  | 97.54   | 93.94   | 52.01          |
| 18 | S976        | 3     | 7.9                        | 80,541,404  | 77,492,548  | 97.46   | 93.68   | 54.13          |

2

3 **Supplementary Table 7.** RNA integrity number, RNA-seq read counts, Quality (Q) score  
4 (Q20 and Q30) values and GC content of the human islet samples from discovery set (n=18).

5



1

| # | Assay ID               | Gene symbol | Dye     | Stock |
|---|------------------------|-------------|---------|-------|
| 1 | Hs03003631_g1          | 18S         | VIC-MGB | 60x*  |
| 2 | Hs01910177_s1 (“177”)  | MALAT1      | FAM-MGB | 20x   |
| 3 | Hs 00273907_s1 (“907”) | MALAT1      | FAM-MGB | 20x   |
| 4 | Hs02741908_m1          | INS         | FAM-MGB | 20x   |

2

3 **Supplementary Table 8:** List of the TaqMan® primer/probe gene expression assays (Thermo  
4 Fisher Scientific, Waltham, MA) used for real-time qPCR on the ViiA7 96-well platform. \*A  
5 one in three dilution was performed to the stock 18s (60x) to match other assays concentration.

6

1

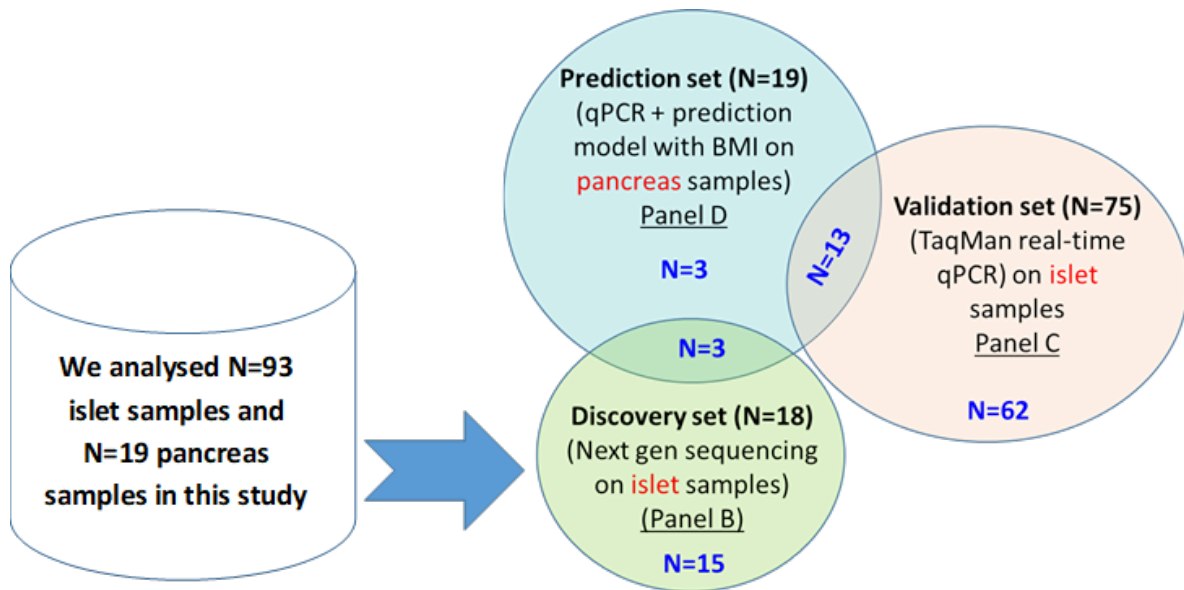

2

3

4 **Supplementary Figure 1: Schematic diagram of workflow on the cadaveric donor**  
5 **pancreas/islets used in this study.**

6 Through the biobank at Westmead Islet Transplant Center, we had access to  $n=93$  human  
7 pancreatic islet samples and  $n=19$  human pancreas samples. The numbers in blue color  
8 represent the number of cadaveric donors from whom islets or pancreas were available. None  
9 of the samples from the “Discovery set” ( $n=18$ ) were used for “Validation set” ( $n=75$ ).  
10 However, pancreas from 13 cadaveric donors who contributed islets to Validation set were  
11 used in the “Prediction set”. Similarly, pancreas from  $n=3$  discovery set donors were used in  
12 the prediction set. Discovery analysis ( $n=18$  islet samples, **Supplementary Table 1**) was based  
13 on Next generation sequencing whilst the validation ( $n=75$  islet samples, **Supplementary**  
14 **Table 2**) and prediction ( $n=19$  pancreas samples, **Supplementary Table 3**) studies were based  
15 on TaqMan qPCR measurements of the two MALAT1 gene transcripts.

16

17

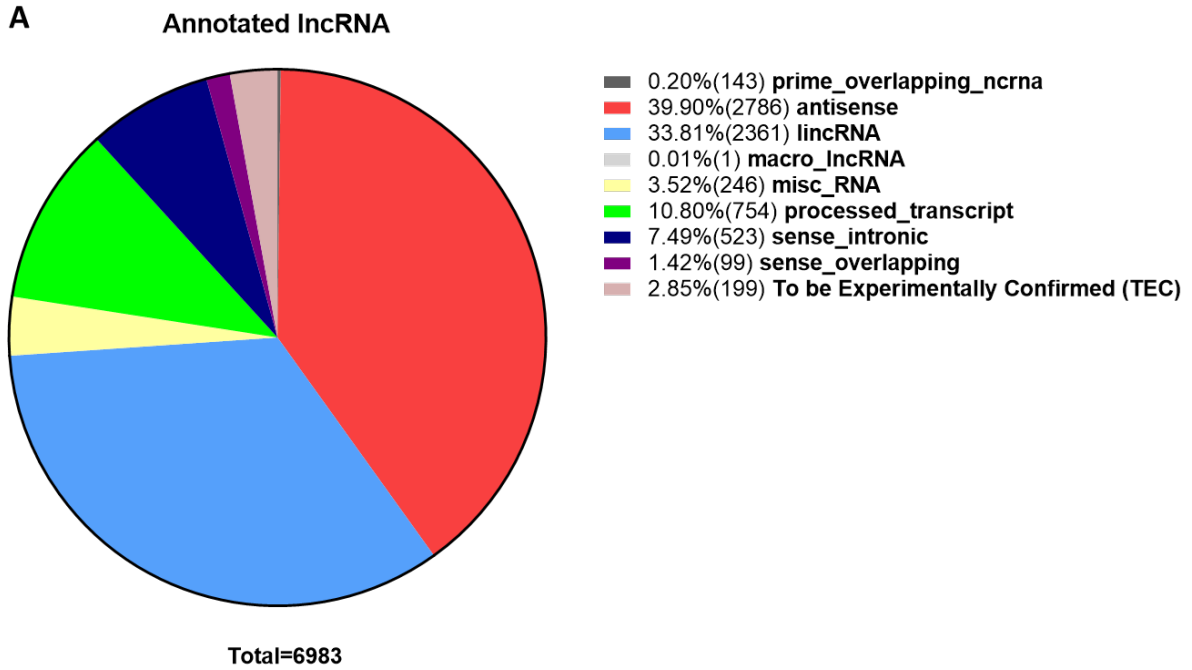

1  
2

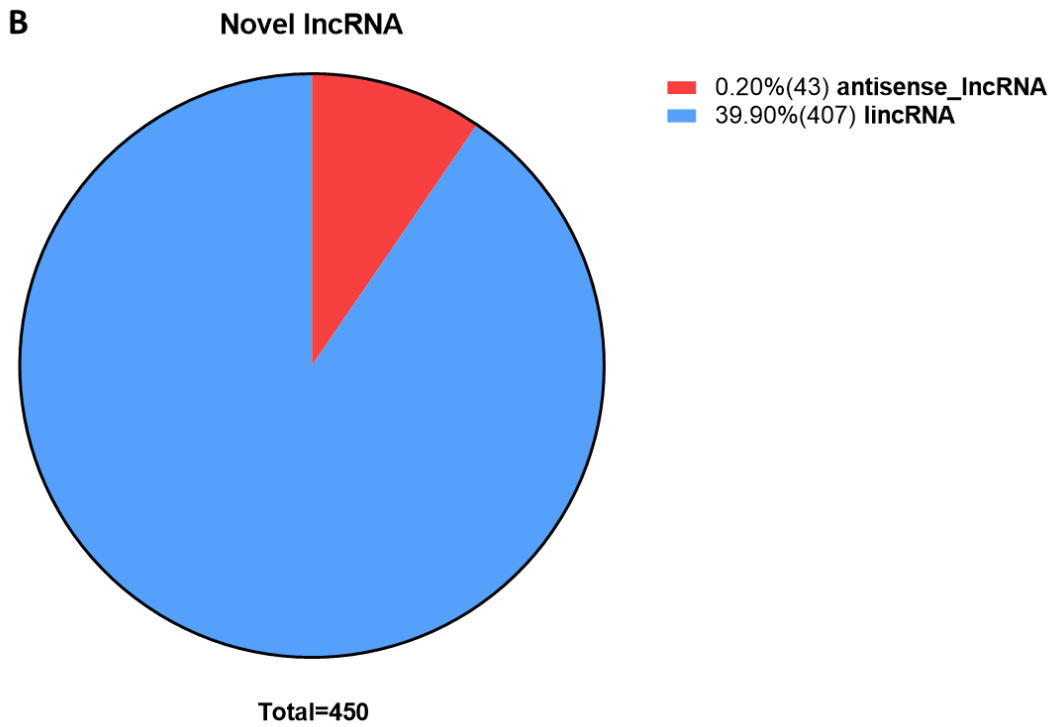

3  
4  
5  
6  
7

**Supplementary Figure 2:** A pie-chart detailing the types of annotated lncRNAs (A) and novel lncRNAs (B) identified through whole transcriptome sequencing of  $n=18$  human islet preparations using the HiSeq4000, 150 Paired-end (PE) reads platform.

1  
2  
3  
4  
5  
6  
7  
8  
9  
10  
11  
12  
13  
14  
15  
16

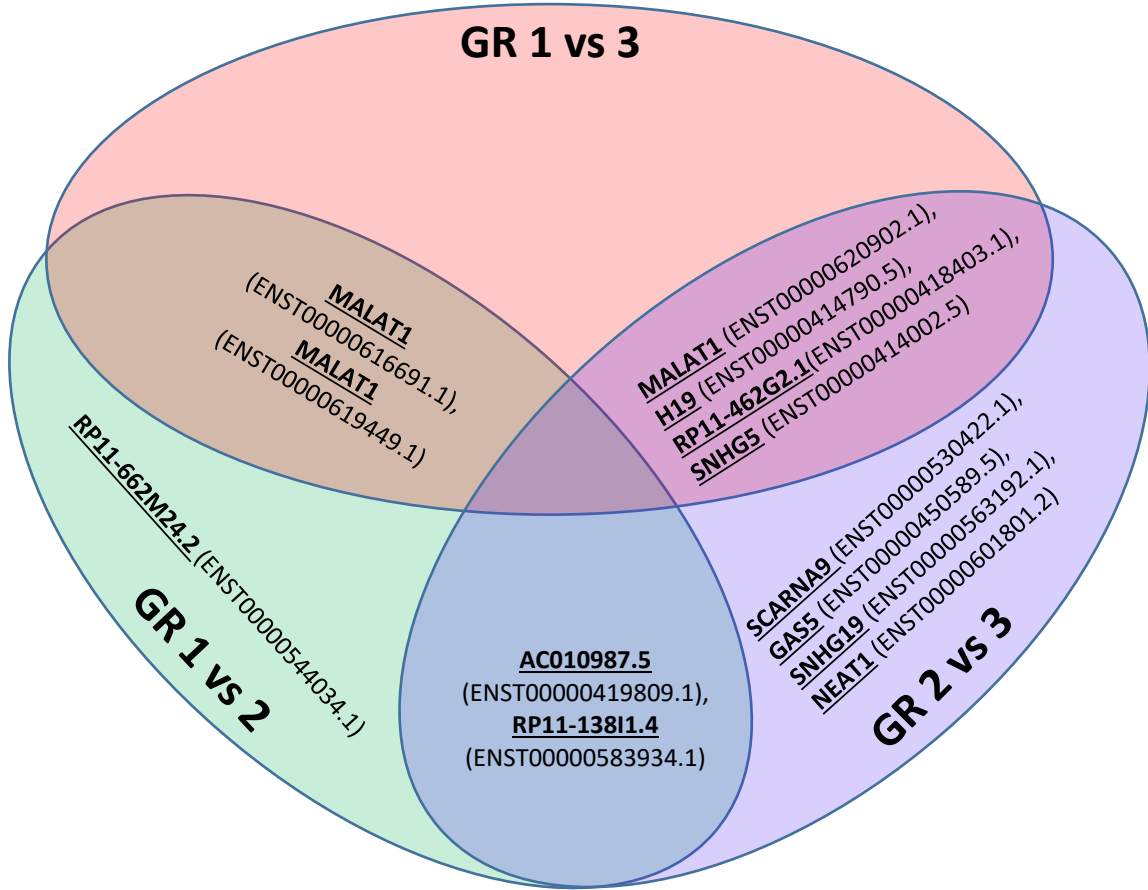

17 **Supplementary Figure 3:** Venn diagram of the set of lncRNAs from the bootstrap PLR  
18 group comparison analyses (**Supplementary Table 4**).

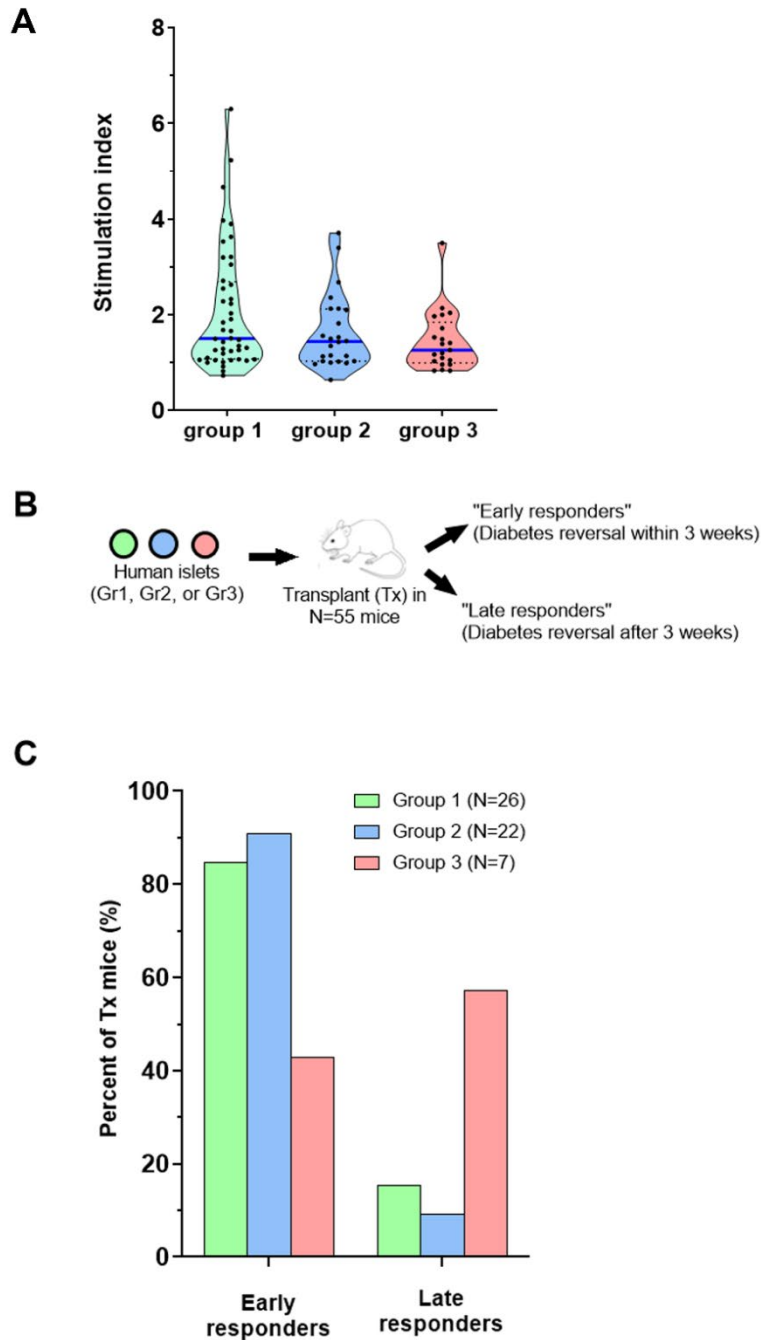

1  
2

3 **Supplementary Figure 4:** The functionality of all human islet preparations was determined in  
 4  $n=89$  of the available 93 samples using (A) the in vitro stimulation index obtained after GSIS  
 5 and in vivo islet transplantation in diabetic animals. (B) Schematic diagram of the workflow  
 6 for human islet transplantation in mice (C) Percent of diabetes reversal within three weeks  
 7 (early responders) or after (late responders) in each group following transplantation in mice is  
 8 calculated. Panel A: Each dot in the violin plot represents a different islet preparation.  
 9 Horizontal solid blue line represents median for each group, the horizontal dotted line  
 10 represents quartiles, while the polygons represent the density of individual data points and  
 11 extend to min/max values.

MALAT1 (Transcript ID: ENST00000616691.1)

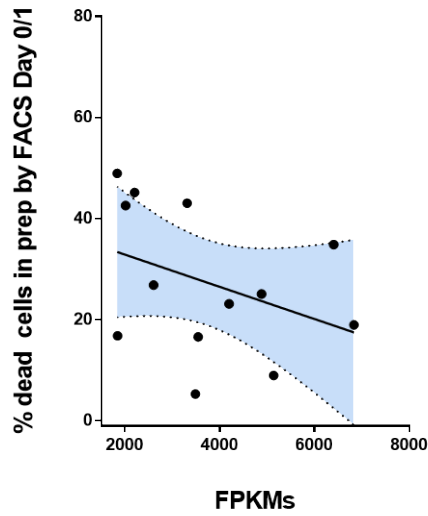

MALAT1 (Transcript ID: ENST00000619449.1)

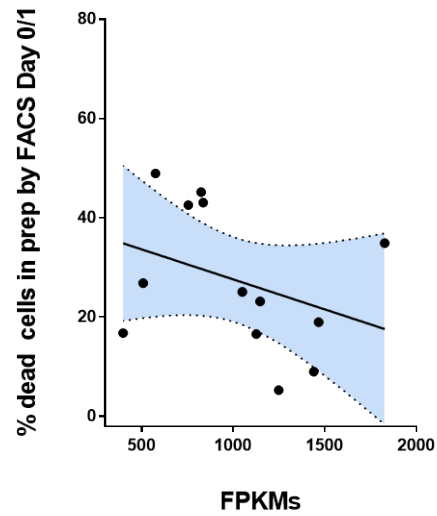

1

2

3 **Supplementary Figure 5:** Flow cytometric assessment of isolated islet cells was carried out  
4 in 24 hours from pancreatic islet isolation and the proportion of dead cells assessed were plotted  
5 relative to the levels of MALAT1 variants (ENST00000616691.1 and ENST00000619449.1)  
6 measured in each of these islet preparations ( $r = -0.45$ , P-value = 0.13 and  $r = -0.42$ , P-value = 0.16  
7 respectively). Islet cell death was negatively associated with MALAT1 transcript abundance  
8 for both the variants shown here. Please note that viability data was not available for  $n = 5$   
9 samples and therefore data for remaining ( $n = 13$ ) samples are presented herein. Results are  
10 presented in Spearman correlation  $r$  and (two-tailed) P-value.

11
